# Supplementary material
Source: publisher figshare collection journal article supplement (https://frontiersin.figshare.com/ndownloader/files/13722872)
Supplement: Supplementary file [file 13722872]

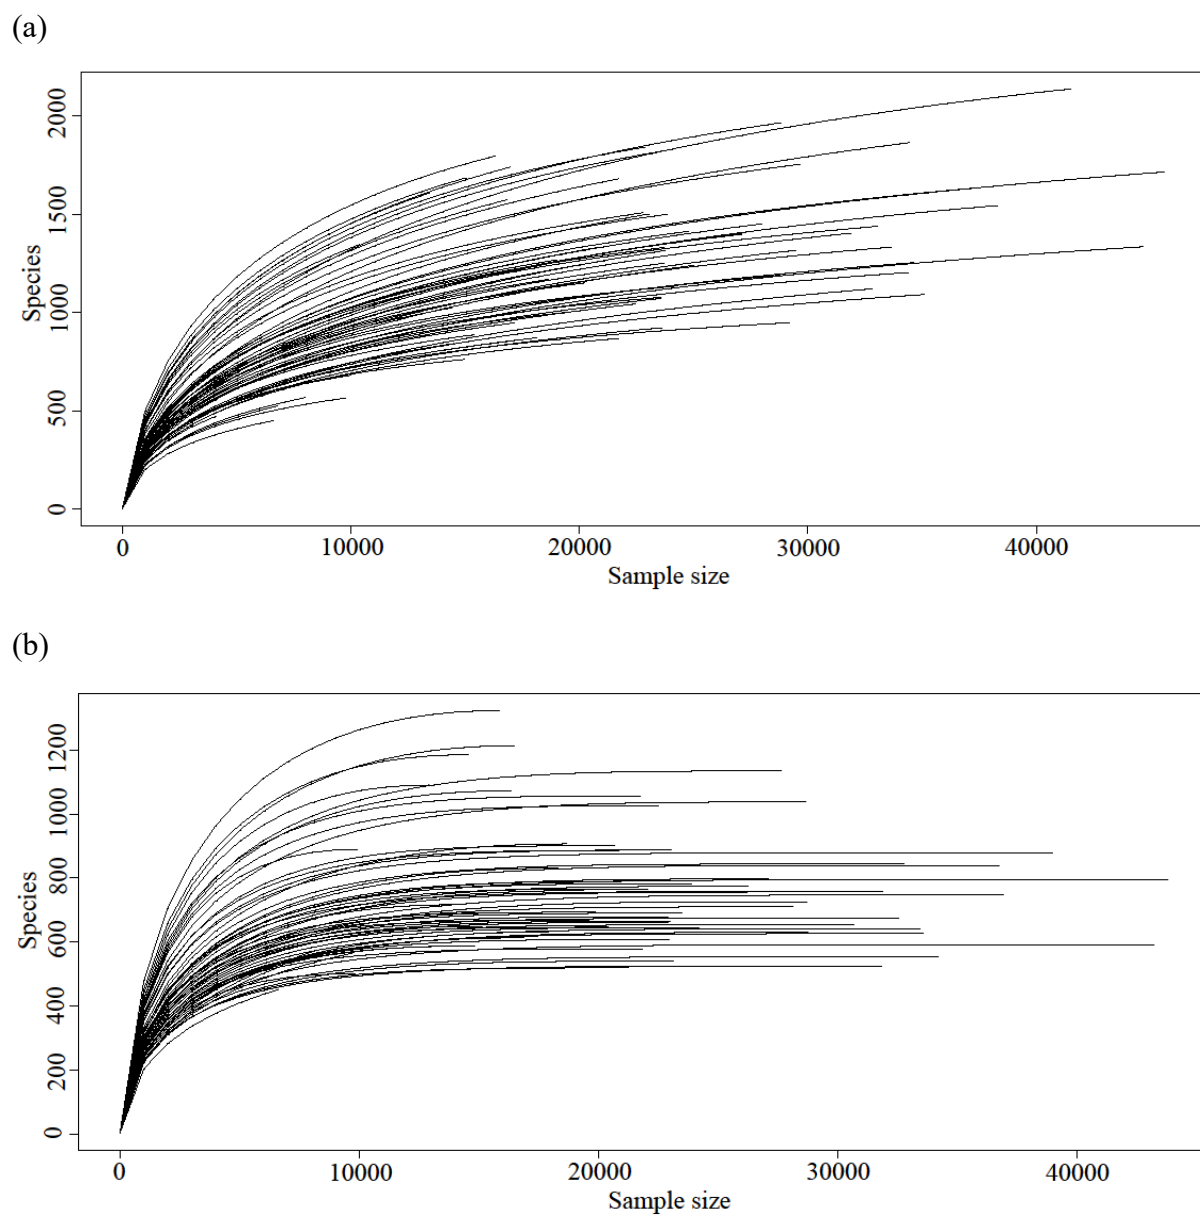

Figure S1. Rarefaction curves for (a) unfiltered taxa and (b) 0.01% filtered taxa.
